# Supplementary material for: Role of physical activity and fitness on sleep in sedentary middle-aged adults: the FIT-AGEING study
Source: PubMed Central journal article supplement (PMC7804461; doi:10.1038/s41598-020-79355-2), 2021-01-12
Supplement: 41598_2020_79355_MOESM1_ESM.pdf [file 41598_2020_79355_MOESM1_ESM.pdf]

**Role of physical activity and fitness on sleep in sedentary middle-aged adults: The  
FIT-AGEING study**

**Sol Mochón-Benguigui<sup>1\*†</sup>, Almudena Carneiro-Barrera<sup>2†</sup>, Manuel J. Castillo<sup>1</sup>,  
Francisco J. Amaro-Gahete<sup>1\*</sup>**

<sup>1</sup> EFFECTS-262 Research group, Department of Medical Physiology, School of  
Medicine, University of Granada, Granada 18016, Spain

<sup>2</sup> Sleep and Health Promotion Laboratory, Mind, Brain and Behaviour Research Centre  
(CIMCYC), University of Granada, Granada 18011, Spain

\*Corresponding author: Francisco J. Amaro-Gahete (amarof@ugr.es)  
& Sol Mochón-Benguigui (solmb@correo.ugr.es)

†These two authors equally contributed to this work.

## SUPPLEMENTARY MATERIAL

**Table S1.** Association of physical activity levels with sleep quantity and quality (Model 0) adjusted by age (Model 1), by total fat mass percentage (Model 2), by fat mass index (Model 3) and by lean mass index (Model 4).

|                                                      | Total sleep time |       |                  | Wake after sleep onset |       |              | Sleep efficiency |       |              | Global PSQI score |       |                  |
|------------------------------------------------------|------------------|-------|------------------|------------------------|-------|--------------|------------------|-------|--------------|-------------------|-------|------------------|
|                                                      | $\beta$          | $R^2$ | P                | $\beta$                | $R^2$ | P            | $\beta$          | $R^2$ | P            | $\beta$           | $R^2$ | P                |
| <b>Sedentary time (min/day)</b>                      |                  |       |                  |                        |       |              |                  |       |              |                   |       |                  |
| Model 0                                              | -0.369           | 0.136 | <b>0.002</b>     | -0.141                 | 0.020 | 0.240        | 0.024            | 0.001 | 0.841        | 0.223             | 0.050 | 0.076            |
| Model 1                                              | -0.368           | 0.142 | <b>0.006</b>     | -0.141                 | 0.020 | 0.496        | 0.024            | 0.001 | 0.964        | 0.228             | 0.095 | <b>0.048</b>     |
| Model 2                                              | -0.327           | 0.280 | <b>&lt;0.001</b> | -0.178                 | 0.134 | <b>0.007</b> | 0.066            | 0.145 | <b>0.005</b> | 0.251             | 0.168 | <b>0.004</b>     |
| Model 3                                              | -0.351           | 0.206 | <b>&lt;0.001</b> | -0.160                 | 0.094 | <b>0.035</b> | 0.044            | 0.090 | <b>0.041</b> | 0.231             | 0.073 | 0.100            |
| Model 4                                              | -0.329           | 0.257 | <b>&lt;0.001</b> | -0.171                 | 0.085 | <b>0.049</b> | 0.059            | 0.089 | <b>0.042</b> | 0.268             | 0.264 | <b>&lt;0.001</b> |
| <b>Light physical activity (min/day)</b>             |                  |       |                  |                        |       |              |                  |       |              |                   |       |                  |
| Model 0                                              | -0.129           | 0.017 | 0.282            | 0.031                  | 0.001 | 0.799        | -0.056           | 0.003 | 0.645        | -0.236            | 0.056 | 0.061            |
| Model 1                                              | -0.134           | 0.024 | 0.431            | 0.030                  | 0.001 | 0.952        | -0.055           | 0.003 | 0.888        | -0.234            | 0.098 | <b>0.043</b>     |
| Model 2                                              | -0.141           | 0.194 | <b>0.001</b>     | 0.039                  | 0.104 | <b>0.024</b> | -0.066           | 0.145 | <b>0.005</b> | -0.229            | 0.158 | <b>0.005</b>     |
| Model 3                                              | -0.139           | 0.102 | <b>0.025</b>     | 0.039                  | 0.070 | 0.085        | -0.065           | 0.092 | <b>0.037</b> | -0.232            | 0.073 | 0.098            |
| Model 4                                              | -0.135           | 0.168 | <b>0.002</b>     | 0.034                  | 0.057 | 0.135        | -0.060           | 0.089 | <b>0.042</b> | -0.239            | 0.250 | <b>&lt;0.001</b> |
| <b>Moderate physical activity (min/day)</b>          |                  |       |                  |                        |       |              |                  |       |              |                   |       |                  |
| Model 0                                              | -0.017           | 0.000 | 0.891            | 0.061                  | 0.004 | 0.611        | -0.054           | 0.003 | 0.657        | -0.249            | 0.062 | <b>0.048</b>     |
| Model 1                                              | -0.006           | 0.007 | 0.800            | 0.066                  | 0.005 | 0.848        | -0.058           | 0.004 | 0.878        | -0.223            | 0.092 | 0.053            |
| Model 2                                              | 0.027            | 0.175 | <b>0.001</b>     | 0.028                  | 0.103 | <b>0.024</b> | -0.015           | 0.141 | <b>0.006</b> | -0.206            | 0.147 | <b>0.008</b>     |
| Model 3                                              | 0.006            | 0.083 | 0.052            | 0.041                  | 0.070 | 0.084        | -0.031           | 0.089 | <b>0.042</b> | -0.236            | 0.075 | 0.094            |
| Model 4                                              | 0.021            | 0.150 | <b>0.004</b>     | 0.039                  | 0.058 | 0.133        | -0.026           | 0.086 | <b>0.046</b> | -0.197            | 0.231 | <b>&lt;0.001</b> |
| <b>Vigorous physical activity (min/day)</b>          |                  |       |                  |                        |       |              |                  |       |              |                   |       |                  |
| Model 0                                              | -0.015           | 0.000 | 0.900            | 0.110                  | 0.012 | 0.363        | -0.112           | 0.013 | 0.352        | -0.049            | 0.002 | 0.703            |
| Model 1                                              | -0.004           | 0.007 | 0.801            | 0.115                  | 0.014 | 0.629        | -0.117           | 0.014 | 0.618        | -0.021            | 0.044 | 0.257            |
| Model 2                                              | 0.006            | 0.174 | <b>0.001</b>     | 0.094                  | 0.111 | <b>0.018</b> | -0.093           | 0.149 | <b>0.004</b> | -0.027            | 0.106 | <b>0.033</b>     |
| Model 3                                              | -0.039           | 0.085 | <b>0.050</b>     | 0.131                  | 0.086 | <b>0.048</b> | -0.137           | 0.107 | <b>0.022</b> | -0.055            | 0.023 | 0.498            |
| Model 4                                              | 0.078            | 0.156 | <b>0.003</b>     | 0.058                  | 0.059 | 0.125        | -0.047           | 0.088 | <b>0.044</b> | 0.037             | 0.194 | <b>0.001</b>     |
| <b>Moderate-vigorous physical activity (min/day)</b> |                  |       |                  |                        |       |              |                  |       |              |                   |       |                  |
| Model 0                                              | -0.017           | 0.000 | 0.886            | 0.067                  | 0.005 | 0.577        | -0.060           | 0.004 | 0.620        | -0.248            | 0.061 | <b>0.048</b>     |
| Model 1                                              | -0.006           | 0.007 | 0.800            | 0.072                  | 0.006 | 0.823        | -0.064           | 0.005 | 0.855        | -0.221            | 0.091 | 0.054            |
| Model 2                                              | 0.027            | 0.175 | <b>0.001</b>     | 0.034                  | 0.104 | <b>0.024</b> | -0.021           | 0.141 | <b>0.006</b> | -0.205            | 0.146 | <b>0.008</b>     |
| Model 3                                              | 0.003            | 0.083 | 0.052            | 0.049                  | 0.071 | 0.082        | -0.039           | 0.089 | <b>0.041</b> | -0.235            | 0.074 | 0.095            |
| Model 4                                              | 0.025            | 0.151 | <b>0.004</b>     | 0.042                  | 0.058 | 0.132        | -0.028           | 0.086 | <b>0.046</b> | -0.192            | 0.229 | <b>&lt;0.001</b> |
| <b>Total physical activity (min/day)</b>             |                  |       |                  |                        |       |              |                  |       |              |                   |       |                  |
| Model 0                                              | -0.086           | 0.007 | 0.474            | 0.051                  | 0.003 | 0.675        | -0.062           | 0.004 | 0.607        | -0.259            | 0.067 | <b>0.039</b>     |
| Model 1                                              | -0.084           | 0.014 | 0.630            | 0.051                  | 0.003 | 0.896        | -0.063           | 0.004 | 0.859        | -0.244            | 0.102 | <b>0.037</b>     |
| Model 2                                              | -0.072           | 0.180 | <b>0.001</b>     | 0.040                  | 0.104 | <b>0.024</b> | -0.049           | 0.143 | <b>0.005</b> | -0.234            | 0.159 | <b>0.005</b>     |
| Model 3                                              | -0.082           | 0.090 | <b>0.041</b>     | 0.047                  | 0.071 | 0.083        | -0.058           | 0.091 | <b>0.039</b> | -0.250            | 0.082 | 0.074            |
| Model 4                                              | -0.070           | 0.155 | <b>0.003</b>     | 0.041                  | 0.058 | 0.133        | -0.050           | 0.088 | <b>0.043</b> | -0.233            | 0.247 | <b>&lt;0.001</b> |

$\beta$  (standardized regression coefficient),  $R^2$ , and  $P$ -value of simple and multiple-regression analysis.

Significant  $P$  values ( $< 0.05$ ) are in bold. PSQI: Pittsburgh Sleep Quality Index.

**Table S2.** Association of physical fitness (including cardiorespiratory fitness and muscular strength) with sleep quantity and quality (Model 0) adjusted by age (Model 1), by total fat mass percentage (Model 2), by fat mass index (Model 3) and by lean mass index (Model 4).

|                                             | Total sleep time |                |                  | Wake after sleep onset |                |              | Sleep efficiency |                |              | Global PSQI score |                |                  |
|---------------------------------------------|------------------|----------------|------------------|------------------------|----------------|--------------|------------------|----------------|--------------|-------------------|----------------|------------------|
|                                             | $\beta$          | R <sup>2</sup> | P                | $\beta$                | R <sup>2</sup> | P            | $\beta$          | R <sup>2</sup> | P            | $\beta$           | R <sup>2</sup> | P                |
| <b>VO<sub>2</sub>max (ml/min)</b>           |                  |                |                  |                        |                |              |                  |                |              |                   |                |                  |
| Model 0                                     | -0.361           | 0.131          | <b>0.002</b>     | 0.199                  | 0.040          | 0.103        | -0.258           | 0.067          | <b>0.033</b> | -0.378            | 0.143          | <b>0.002</b>     |
| Model 1                                     | -0.365           | 0.132          | <b>0.010</b>     | 0.202                  | 0.040          | 0.261        | -0.263           | 0.069          | 0.097        | -0.362            | 0.163          | <b>0.004</b>     |
| Model 2                                     | -0.234           | 0.173          | <b>0.002</b>     | 0.072                  | 0.082          | 0.061        | -0.119           | 0.118          | <b>0.017</b> | -0.291            | 0.161          | <b>0.004</b>     |
| Model 3                                     | -0.335           | 0.171          | <b>0.002</b>     | 0.172                  | 0.081          | 0.063        | -0.228           | 0.118          | <b>0.017</b> | -0.366            | 0.148          | <b>0.007</b>     |
| Model 4                                     | -0.252           | 0.136          | <b>0.009</b>     | 0.090                  | 0.046          | 0.220        | -0.148           | 0.073          | 0.086        | -0.082            | 0.187          | <b>0.002</b>     |
| <b>VO<sub>2</sub>max (ml/kg/min)</b>        |                  |                |                  |                        |                |              |                  |                |              |                   |                |                  |
| Model 0                                     | -0.309           | 0.095          | <b>0.010</b>     | 0.209                  | 0.044          | 0.087        | -0.253           | 0.064          | <b>0.037</b> | -0.422            | 0.178          | <b>&lt;0.001</b> |
| Model 1                                     | -0.314           | 0.097          | <b>0.036</b>     | 0.213                  | 0.045          | 0.226        | -0.260           | 0.067          | 0.105        | -0.404            | 0.193          | <b>0.001</b>     |
| Model 2                                     | -0.129           | 0.143          | <b>0.007</b>     | 0.052                  | 0.080          | 0.066        | -0.075           | 0.111          | <b>0.022</b> | -0.362            | 0.184          | <b>0.002</b>     |
| Model 3                                     | -0.247           | 0.107          | <b>0.026</b>     | 0.125                  | 0.064          | 0.117        | -0.165           | 0.087          | 0.052        | -0.458            | 0.183          | <b>0.002</b>     |
| Model 4                                     | -0.193           | 0.145          | <b>0.006</b>     | 0.144                  | 0.059          | 0.137        | -0.172           | 0.089          | <b>0.049</b> | -0.275            | 0.241          | <b>&lt;0.001</b> |
| <b>Extension peak torque (Nm)</b>           |                  |                |                  |                        |                |              |                  |                |              |                   |                |                  |
| Model 0                                     | -0.346           | 0.119          | <b>0.004</b>     | 0.151                  | 0.023          | 0.218        | -0.217           | 0.047          | 0.075        | -0.334            | 0.112          | <b>0.007</b>     |
| Model 1                                     | -0.346           | 0.119          | <b>0.016</b>     | 0.167                  | 0.031          | 0.359        | -0.233           | 0.056          | 0.155        | -0.304            | 0.131          | <b>0.013</b>     |
| Model 2                                     | -0.183           | 0.180          | <b>0.002</b>     | -0.003                 | 0.077          | 0.073        | -0.044           | 0.115          | <b>0.019</b> | -0.233            | 0.127          | <b>0.015</b>     |
| Model 3                                     | -0.305           | 0.160          | <b>0.003</b>     | 0.108                  | 0.070          | 0.093        | -0.169           | 0.104          | <b>0.028</b> | -0.324            | 0.112          | <b>0.025</b>     |
| Model 4                                     | -0.123           | 0.143          | <b>0.007</b>     | 0.033                  | 0.030          | 0.375        | -0.061           | 0.059          | 0.139        | 0.074             | 0.180          | <b>0.002</b>     |
| <b>Extension peak torque/Weight (Nm/kg)</b> |                  |                |                  |                        |                |              |                  |                |              |                   |                |                  |
| Model 0                                     | -0.284           | 0.081          | <b>0.019</b>     | 0.192                  | 0.037          | 0.116        | -0.234           | 0.055          | 0.055        | -0.313            | 0.098          | <b>0.011</b>     |
| Model 1                                     | -0.284           | 0.081          | <b>0.064</b>     | 0.210                  | 0.047          | 0.211        | -0.252           | 0.064          | 0.115        | -0.283            | 0.119          | <b>0.020</b>     |
| Model 2                                     | -0.029           | 0.157          | <b>0.004</b>     | 0.006                  | 0.077          | 0.073        | -0.009           | 0.114          | <b>0.019</b> | -0.191            | 0.112          | <b>0.025</b>     |
| Model 3                                     | -0.199           | 0.098          | <b>0.035</b>     | 0.085                  | 0.064          | 0.115        | -0.118           | 0.087          | 0.053        | -0.368            | 0.103          | <b>0.034</b>     |
| Model 4                                     | -0.117           | 0.148          | <b>0.006</b>     | 0.141                  | 0.043          | 0.237        | -0.147           | 0.073          | 0.085        | -0.105            | 0.186          | <b>0.002</b>     |
| <b>Flexion peak torque (Nm)</b>             |                  |                |                  |                        |                |              |                  |                |              |                   |                |                  |
| Model 0                                     | -0.294           | 0.087          | <b>0.015</b>     | 0.180                  | 0.032          | 0.143        | -0.227           | 0.052          | 0.063        | -0.345            | 0.119          | <b>0.005</b>     |
| Model 1                                     | -0.292           | 0.088          | 0.051            | 0.186                  | 0.038          | 0.282        | -0.233           | 0.057          | 0.149        | -0.325            | 0.147          | <b>0.007</b>     |
| Model 2                                     | -0.103           | 0.164          | <b>0.003</b>     | 0.032                  | 0.078          | 0.071        | -0.052           | 0.116          | <b>0.018</b> | -0.250            | 0.133          | <b>0.012</b>     |
| Model 3                                     | -0.237           | 0.122          | <b>0.015</b>     | 0.118                  | 0.072          | 0.088        | -0.159           | 0.100          | <b>0.033</b> | -0.339            | 0.119          | <b>0.020</b>     |
| Model 4                                     | -0.063           | 0.140          | <b>0.007</b>     | 0.117                  | 0.036          | 0.302        | -0.114           | 0.064          | 0.115        | -0.073            | 0.181          | <b>0.002</b>     |
| <b>Flexion peak torque/Weight (Nm/kg)</b>   |                  |                |                  |                        |                |              |                  |                |              |                   |                |                  |
| Model 0                                     | -0.192           | 0.037          | 0.117            | 0.209                  | 0.044          | 0.088        | -0.223           | 0.050          | 0.068        | -0.315            | 0.099          | <b>0.011</b>     |
| Model 1                                     | -0.190           | 0.039          | 0.275            | 0.212                  | 0.049          | 0.197        | -0.226           | 0.054          | 0.166        | -0.302            | 0.133          | <b>0.012</b>     |
| Model 2                                     | 0.070            | 0.160          | <b>0.003</b>     | 0.066                  | 0.080          | 0.066        | -0.032           | 0.115          | <b>0.019</b> | -0.202            | 0.119          | <b>0.019</b>     |
| Model 3                                     | -0.067           | 0.073          | 0.084            | 0.108                  | 0.067          | 0.104        | -0.101           | 0.084          | 0.058        | -0.348            | 0.101          | <b>0.036</b>     |
| Model 4                                     | -0.063           | 0.142          | <b>0.007</b>     | 0.168                  | 0.054          | 0.166        | -0.155           | 0.079          | 0.070        | -0.159            | 0.199          | <b>0.001</b>     |
| <b>Hand grip strength (kg)</b>              |                  |                |                  |                        |                |              |                  |                |              |                   |                |                  |
| Model 0                                     | -0.413           | 0.170          | <b>&lt;0.001</b> | 0.228                  | 0.052          | 0.058        | -0.294           | 0.087          | <b>0.013</b> | -0.375            | 0.141          | <b>0.002</b>     |
| Model 1                                     | -0.408           | 0.171          | <b>0.002</b>     | 0.233                  | 0.054          | 0.158        | -0.301           | 0.089          | <b>0.044</b> | -0.350            | 0.165          | <b>0.003</b>     |
| Model 2                                     | -0.256           | 0.212          | <b>&lt;0.001</b> | 0.068                  | 0.096          | <b>0.034</b> | -0.120           | 0.139          | <b>0.007</b> | -0.292            | 0.151          | <b>0.005</b>     |
| Model 3                                     | -0.368           | 0.210          | <b>&lt;0.001</b> | 0.181                  | 0.096          | <b>0.034</b> | -0.243           | 0.140          | <b>0.006</b> | -0.365            | 0.142          | <b>0.007</b>     |
| Model 4                                     | -0.341           | 0.172          | <b>0.002</b>     | 0.160                  | 0.053          | 0.160        | -0.233           | 0.088          | <b>0.046</b> | 0.087             | 0.195          | <b>0.001</b>     |
| <b>Hand grip strength/Weight</b>            |                  |                |                  |                        |                |              |                  |                |              |                   |                |                  |
| Model 0                                     | -0.413           | 0.171          | <b>&lt;0.001</b> | 0.287                  | 0.083          | <b>0.016</b> | -0.346           | 0.119          | <b>0.003</b> | -0.366            | 0.134          | <b>0.002</b>     |
| Model 1                                     | -0.409           | 0.173          | <b>0.002</b>     | 0.291                  | 0.084          | 0.053        | -0.349           | 0.121          | <b>0.013</b> | -0.345            | 0.163          | <b>0.003</b>     |
| Model 2                                     | -0.233           | 0.193          | <b>0.001</b>     | 0.129                  | 0.100          | <b>0.030</b> | -0.167           | 0.141          | <b>0.006</b> | -0.300            | 0.137          | <b>0.009</b>     |
| Model 3                                     | -0.370           | 0.175          | <b>0.002</b>     | 0.211                  | 0.095          | <b>0.035</b> | -0.267           | 0.133          | <b>0.008</b> | -0.425            | 0.142          | <b>0.008</b>     |
| Model 4                                     | -0.285           | 0.191          | <b>0.001</b>     | 0.257                  | 0.084          | 0.054        | -0.293           | 0.123          | <b>0.012</b> | -0.107            | 0.199          | <b>0.001</b>     |

$\beta$  (standardized regression coefficient),  $R^2$ , and  $P$ -value of simple and multiple-regression analysis. Significant  $P$  values ( $< 0.05$ ) are in bold. PSQI: Pittsburgh Sleep Quality Index.
